# Supplementary material
Source: MDPI journal article supplement (https://www.mdpi.com/2073-4395/8/4/45)
Supplement: s1 [file s1]

## Sheet: Hoja1
Table S1: Putative metabolites for the top ten m/z bins that separate quality groups in Table 1.
Bin	Mass in list	Name
203	203.011	4-coumarate
	203.011	coumaric acid
	203.011	hydroxycinnamic acid
	203.011	phenylpyruvate
	203.019	perseitol
	203.026	1-phenylhepta-1,3,5-triyne
	203.032	3-(4-hydroxyphenyl)pyruvate
	203.032	caffeate
	203.032	caffeic acid
	203.032	2-deoxy glucose
	203.032	beta-D-fucose
	203.032	fucose
	203.032	quercitol
	203.032	quinovose
	203.032	rhamnose
	203.032	viburnitol
	203.034	xanthotoxol
	203.038	S-methylmethionine
	203.053	alpha-D-glucose
	203.053	alpha-D-mannose
	203.053	beta-D-glucose
	203.053	fructose
	203.053	galactose
	203.053	glucose
	203.053	hammamelose
	203.053	mannose
	203.053	myo-insitol
	203.053	sorbose
	203.053	D-myo-inositol
	203.053	myo-inositol
	203.068	coniferyl alcohol
	203.084	jasmone
140	140.011	L-azetidine 2-carboxylic acid
	140.032	aspartate-4-semialdehyde
	140.048	indole
	140.069	1-aminocyclopropane-1-carboxylate
	140.069	glycinebetaine
	140.069	valine
	140.069	L-valine
	140.084	hexylamine
	140.094	2-amino-3-oxobutanoate
	140.094	L-aspartate-semialdehyde
239	238.972	erythrose-4-phosphate
	238.993	erythronate-4-phosphate
	238.996	4-fumarylacetoacetate
	238.997	5-(3-buten-1-ynyl)-2,2'-bithienyl
	239.011	alpha-terthienyl
	239.03	2-C-methyl-D-erythritol-4-phosphate
	239.032	bergapten
	239.032	xanthotoxin
	239.043	erythro-1-(imidazol-4-yl)glycerol-3-phosphate
	239.047	safynol
	239.049	D-erythrose-4-phosphate
	239.077	2-deoxy-D-manno-octulosonic acid
	239.077	3-deoxy-D-manno-octulosonic acid
118	117.961	phosphate
	118.027	4-hydroxypyridine
	118.05	aspartate-4-semialdehyde
	118.065	pyridine-ring
	118.066	indole
	118.087	glycinebetaine
	118.087	valine
	118.087	L-valine
383	383.074	rosmarinic acid
	383.096	clusianose
	383.096	maltitol
	383.096	melibiitol
204	204.043	phenylalanine
	204.064	l-tyrosine
	204.064	tyrosine
	204.079	hordenine
	204.079	L-ephedrine
156	156.006	aspartate-4-semialdehyde
	156.022	indole
	156.027	aspartic acid
	156.027	L-aspartic acid
	156.043	glycinebetaine
	156.043	valine
	156.043	L-valine
	156.068	2-amino-3-oxobutanoate
	156.068	L-aspartate-semialdehyde
	156.071	guanidinoacetate
	156.077	histidine
	156.077	L-histidine
	156.094	D-aspartate
	156.094	L-aspartate
261	261.017	fraxinol
	261.017	isofraxidin
	261.017	leptodactylone
	261.025	erythro-1-(imidazol-4-yl)glycerol-3-phosphate
	261.031	S-[(E)-prop-1-enyl]-L-cysteine S-oxide
	261.031	cystathionine
	261.032	flavone
	261.038	1L-myo-inositol-1-phosphate
	261.038	alpha-D-glucose-6-phosphate
	261.038	alpha-D-mannose-1-phosphate
	261.038	beta-D-fructose-6-phosphate
	261.038	beta-D-glucose-6-phosphate
	261.038	fructose-6-phosphate
	261.038	galactose-1-phosphate
	261.038	glucose-1-phosphate
	261.038	glucose-6-phosphate
	261.038	mannose-6-phosphate
	261.038	tagatose-6-phosphate
	261.038	fructose-1-phosphate
	261.059	2-deoxy-D-manno-octulosonic acid
	261.059	3-deoxy-D-manno-octulosonic acid
301.2	301.214	alpha-Eleostearic acid
	301.214	alpha-linolenic acid
	301.214	gamma-linolenic acid
	301.214	linolenic acid
	301.214	punicic acid
	301.214	y-linolenic acid
	301.241	(E,E,E)-N-("-methylpropyl)hexadeca-2,6,8-trien-10-ynamide
	301.297	alpha;-ribazole
245	245.006	2-hydroxybutane-1,2,4-tricarboxylate
	245.006	homoisocitrate
	245.007	lipoic acid
	245.022	scoparone
	245.043	fraxinol
	245.043	isofraxidin
	245.043	leptodactylone
	245.057	S-[(E)-prop-1-enyl]-L-cysteine S-oxide
	245.057	cystathionine
	245.058	flavone
	245.073	alloimperatorin
	245.077	uridine
	245.081	wyerone acid
	245.096	biotin
471	471.09	carthamone
	471.09	quercitrin
361	361.02	dTMP
	361.053	1-(5'-phosphoribosyl)-5-amino-4-imidazolecarboxamide
	361.09	4-coumaroylquinate
	361.092	rosmarinic acid
157	156.99	succinic acid
	157.011	mailc acid
	157.023	(-)-ureidoglycolate
	157.023	(+)-ureidoglycolate
	157.025	orotate
	157.03	S-dimethylsulfonium
	157.038	3-methylamino-L-alanine
	157.038	L-alpha,y-Diaminobutyric acid
	157.048	(R)-2,3-dihydroxy-3-methylbutanoateM
	157.048	2,3-dihydroxy-3-methylbutanoate
	157.048	deoxyribose
	157.048	1-deoxy-D-xylulose
	157.077	3-indoleacetonitrile
	157.078	malate
	157.081	S-ureidoglycolate
227	227.017	oxaloglutarate
	227.056	chorismate
	227.056	prephenate
	227.069	azelaic acid
	227.08	tryptophan
	227.08	L-tryptophan
	227.091	L-homoarginine
	227.095	N,N-dimethyltryptamine
173	172.985	mailc acid
	172.996	(-)-ureidoglycolate
	172.996	(+)-ureidoglycolate
	173.004	S-dimethylsulfonium
	173.006	tartaric acid
	173.021	sn-glycerol-3-phosphate
	173.022	(R)-2,3-dihydroxy-3-methylbutanoateM
	173.022	2,3-dihydroxy-3-methylbutanoate
	173.022	deoxyribose
	173.022	1-deoxy-D-xylulose
	173.043	arabinose
	173.043	D-Apiose
	173.043	ribose
	173.043	ribulose
	173.043	xylose
	173.043	xylulose
	173.043	dipropyl disulfide
	173.045	3-dehydroshikimate
	173.052	malate
	173.055	S-ureidoglycolate
	173.058	coumaryl-alcohol
	173.06	dehydromatricaria ester
	173.06	vitamin K3
	173.084	adenine-ring
	173.096	2,3-dihydroxy-isovalerate
	173.096	nt-pentose-ring
329	329.004	sedoheptulose-7-phosphate
	329.015	2',3'-cyclic UMP
	329.015	2-3 cyclic UMP
	329.043	catechin
	329.043	epicatechin
	329.086	N-(L-arginino)succinate
195	194.981	orotate
	195.003	sn-glycerol-3-phosphate
	195.027	3-dehydroshikimate
	195.032	3-indoleacetonitrile
	195.042	dehydromatricaria ester
	195.042	vitamin K3
	195.05	2-keto-D-gluconic acid
	195.05	5-keto-D-gluconic acid
	195.05	alpha-D-galacturonic acid
	195.05	fructuronate
	195.05	galacturonic acid
	195.05	glucuronate
	195.05	glucuronate and isomers
	195.05	iduronic acid
	195.05	tagaluronate
	195.066	5-hydroxy-coniferaldehyde
	195.066	ferulic acid
	195.079	y-nonalactone
	195.087	l-bornesitol
	195.087	ononitol
	195.087	pinitol
	195.087	quebrachitol
	195.087	sequoyitol
	195.088	caffeine
Putative metabolites were assigned to the mass bins by searching the web and assigning accurate mass from empirical formulae.
Mass bins 441.2, 449, 539 and 701.2 were not assigned candidates.
